# Supplementary material for: Synthesis of thorium–ethanolamine nanocomposite by the co-precipitation method and its application for Cr(vi) removal
Source: Royal Society of Chemistry journal article supplement (doi:10.1039/c7nj05074g), 2018-01-01
Supplement: c7nj05074g1.pdf [file c7nj05074g1.pdf]

**Synthesis of Thorium-Ethanolamine nanocomposite by co-precipitation method  
and its application for Cr(VI) removal**

Sumanta Sahu, Uttam Kumar Sahu, Raj Kishore Patel\*

Department of Chemistry, National Institute of Technology, Rourkela, India

**Total no of pages 3 (excluding cover page)**

**No of figures: 5**

*\*Corresponding author: E-mail: [rkpatel@nitrkl.ac.in](mailto:rkpatel@nitrkl.ac.in),*

*Author: [imsumantasahu@gmail.com](mailto:imsumantasahu@gmail.com)*

*Address: Prof. R.K Patel*

*Department of chemistry,*

*National Institute of Technology, Rourkela, Odisha, India*

*Phone: +91-0661-246-2652, +91-9237194381*

*Fax: +91-0661-246-2651*

Supplementary Information

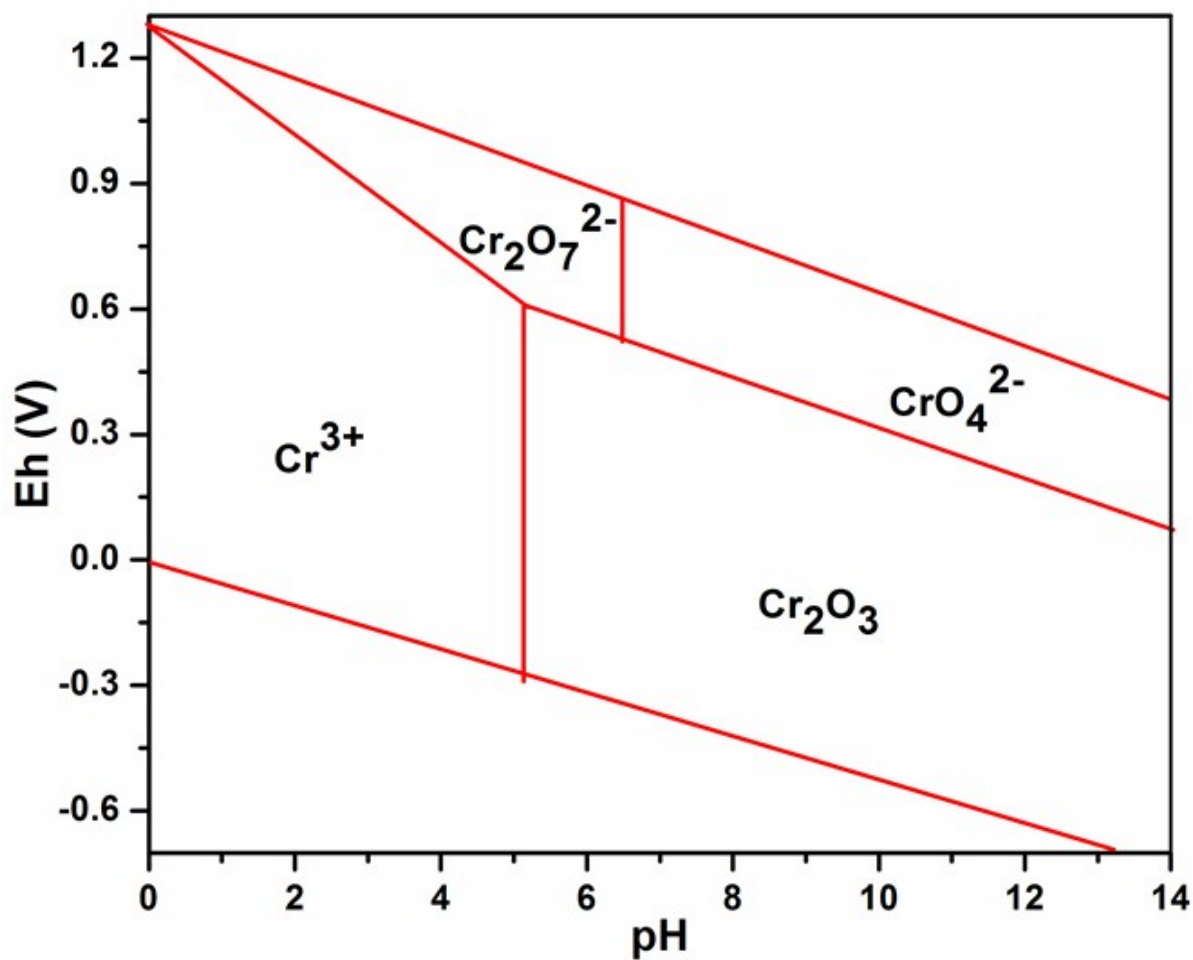

Figure S1 Speciation curve of Chromium in different pH

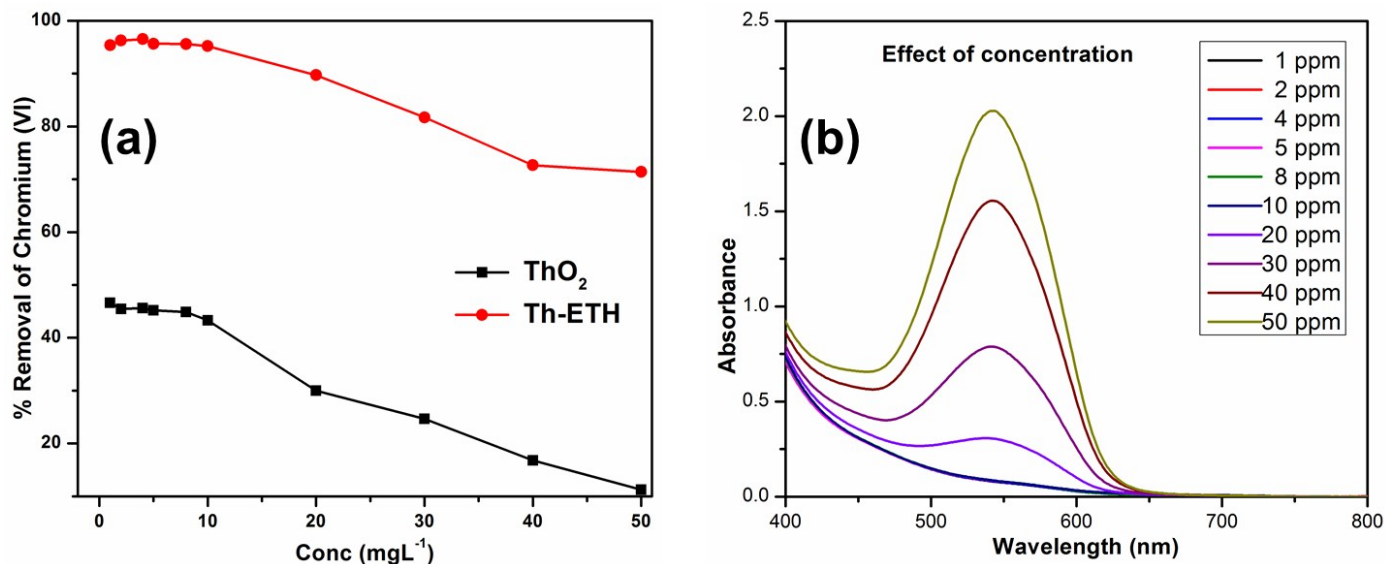

**Figure S2** Removal % of ThO<sub>2</sub> and Th-ETH (a) and Absorption spectra of Th-ETH after adsorption of Cr(VI) (b) with variation of concentration

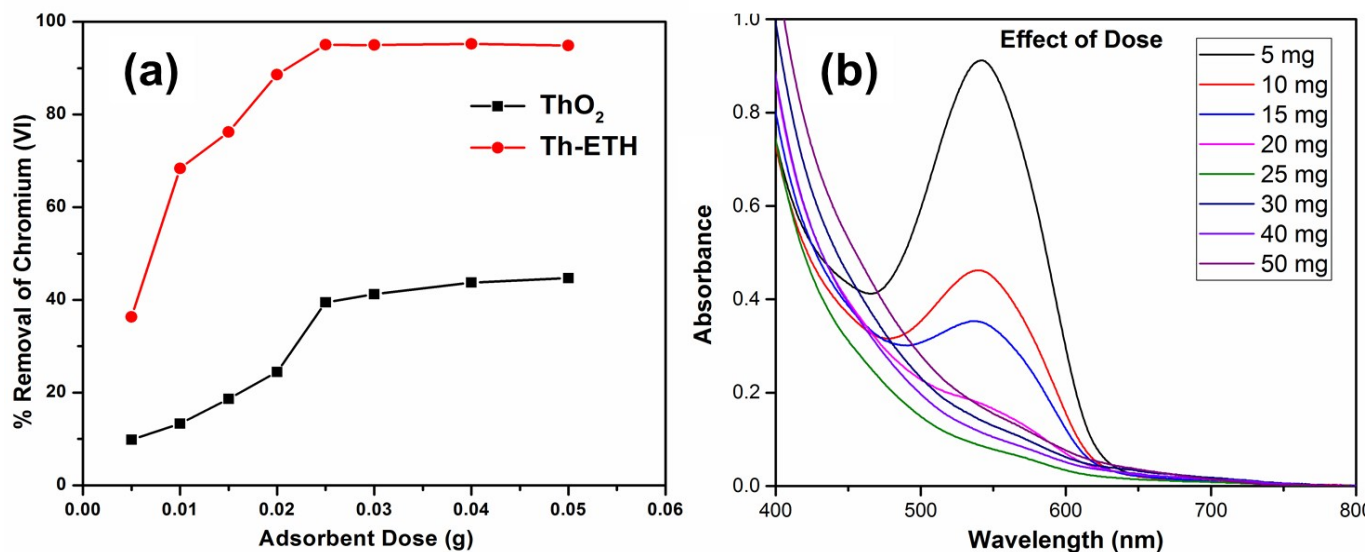

**Figure S3** Removal % of ThO<sub>2</sub> and Th-ETH (a) and Absorption spectra of Th-ETH after adsorption of Cr(VI) (b) with variation of adsorbent dosage.

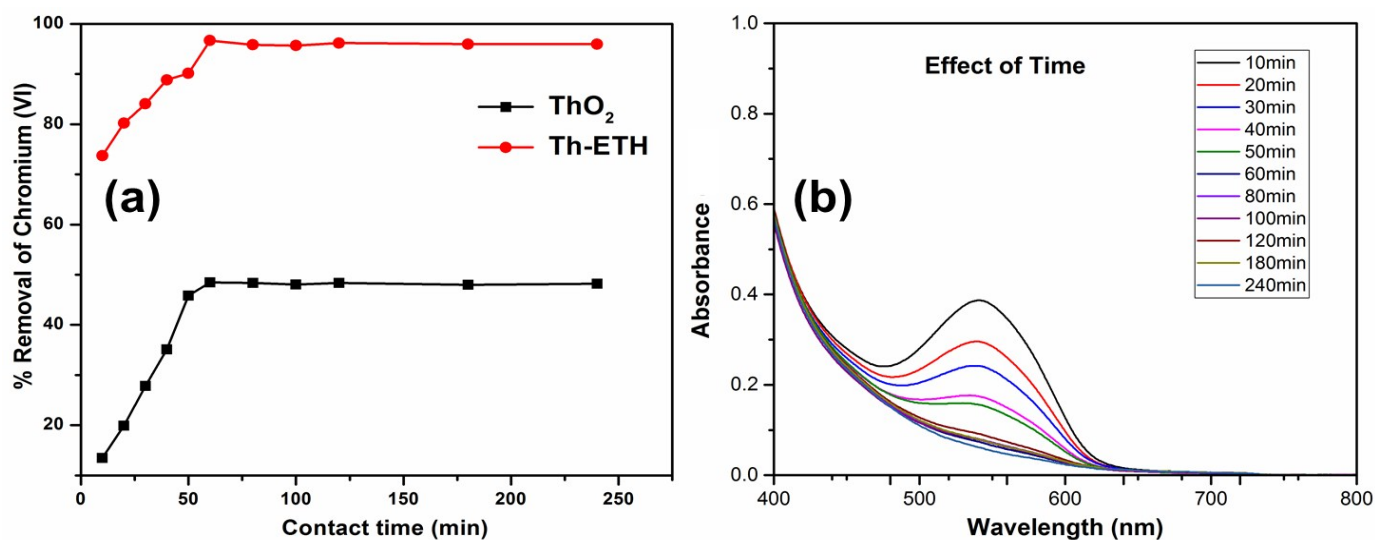

Figure S4 Removal % of ThO<sub>2</sub> and Th-ETH (a) and Absorption spectra of Th-ETH after adsorption of Cr(VI) (b) with variation of time

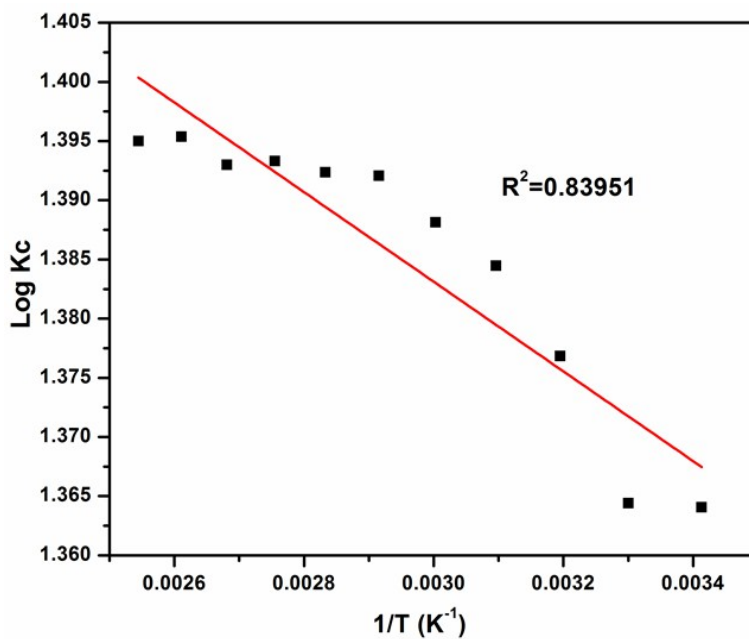

Figure S5 Van't Hoff plot for the Th-ETH
